# Supplementary material
Source: Research Square preprint supplement (doi:10.21203/rs.3.rs-9749814/v1)
Supplement: Supplementary file 1 [file a055570c9feb042615a5fa5c.docx]

Supplementary File S2

Post-hoc Power Analysis

No prospective sample-size calculation was performed because this was a retrospective exploratory study including all consecutive eligible patients during the study period.

For completeness, post-hoc statistical power for the primary diagnostic ROC analysis was estimated using the Hanley–McNeil standard error approach for testing AUC > 0.5 at α = 0.05.

For prostate volume (PV), the observed area under the ROC curve (AUC) was 0.774 with 50 prostate cancer cases and 50 benign prostatic hyperplasia controls.

The estimated standard error (SE) was 0.0469, corresponding to a 95% confidence interval of 0.682–0.866.

The estimated post-hoc statistical power was approximately 0.9999.

These findings suggest that the study had sufficient statistical power to detect the observed diagnostic performance of prostate volume in differentiating prostate cancer from benign prostatic hyperplasia.
